# Supplementary material for: Heterogeneous Responses to Antioxidants in Noradrenergic Neurons of the Locus Coeruleus Indicate Differing Susceptibility to Free Radical Content
Source: Hindawi journal article supplement (doi:10.1155/2012/820285), 2012-01-01
Supplement: f1 [file 820285.f1.pdf]

|                  | <b>No Effect</b>                 | <b>Hyperpolarized</b>              |
|------------------|----------------------------------|------------------------------------|
|                  | (100 $\mu$ M Trolox, n=6)        | (100 $\mu$ M Trolox, n=3)          |
| Firing (Hz)      | 1.24 $\pm$ 0.4                   | 2.63 $\pm$ 1.3                     |
| RMP (mV)         | -46.5 $\pm$ 0.7                  | -46.7 $\pm$ 0.7                    |
| IR (M $\Omega$ ) | 134.3 $\pm$ 20.3                 | 112.2 $\pm$ 16.5                   |
| AP Amplitude     | <b>91.4 <math>\pm</math> 1.7</b> | <b>73.1 <math>\pm</math> 4.1</b> * |
| AHP Amplitude    | 22.2 $\pm$ 1.1                   | 19.4 $\pm$ 1.5                     |
